# Supplementary material
Source: publisher site journal article supplement (https://www.dovepress.com/article/335749)
Supplement: Supplementary file 1 [file get_supplementary_file.php]

**Supplemental Information**

**
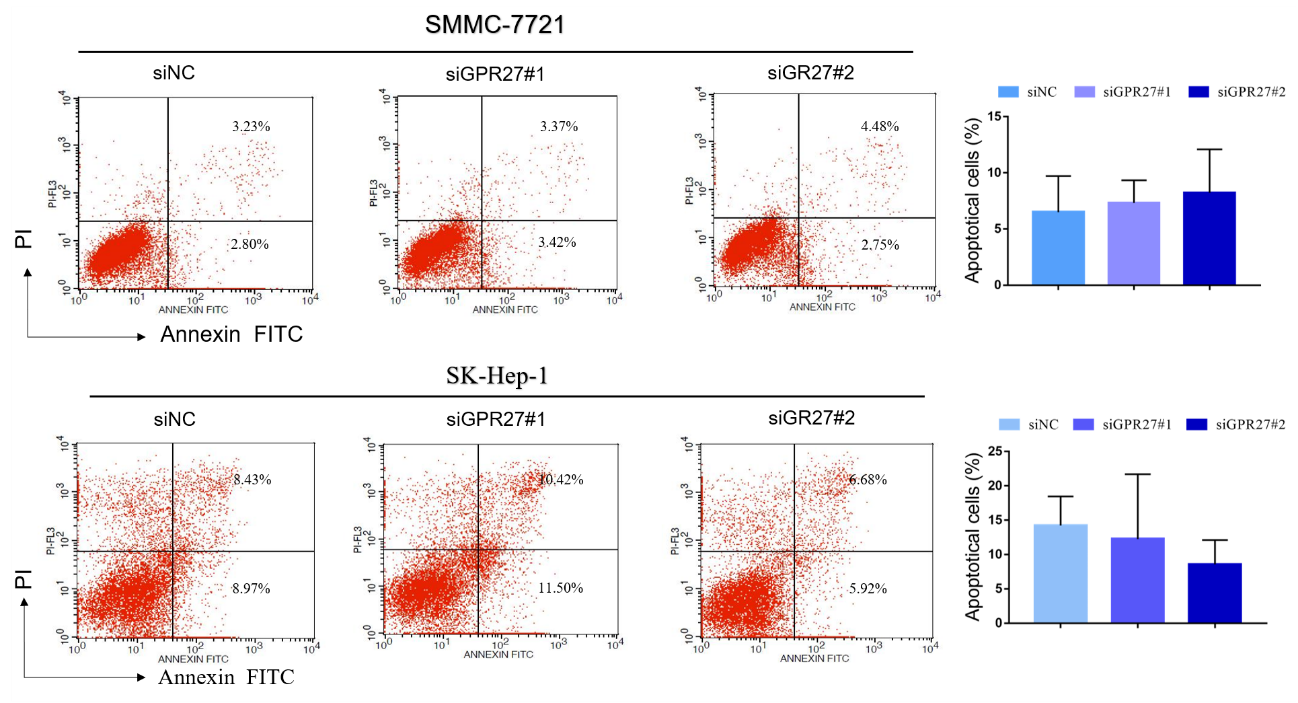
Figure S1.** Cell apoptosis was measured by flow cytometry using Annexin V/PI staining in cells treated with control or GPR27 siRNAs.

**
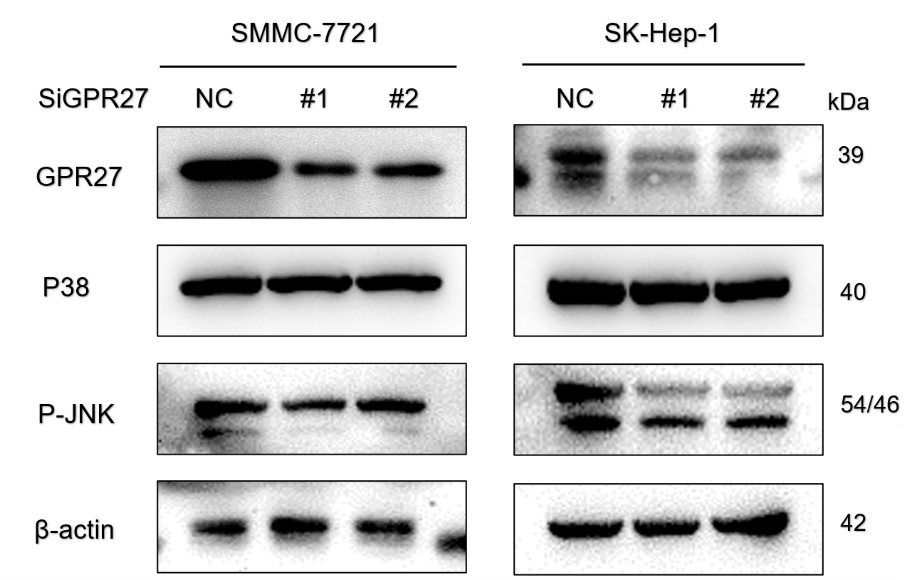
**

**Figure S2.** The expression of P38 and P-JNK were analyzed through Western blot analysis after GPR27 knockdown. **
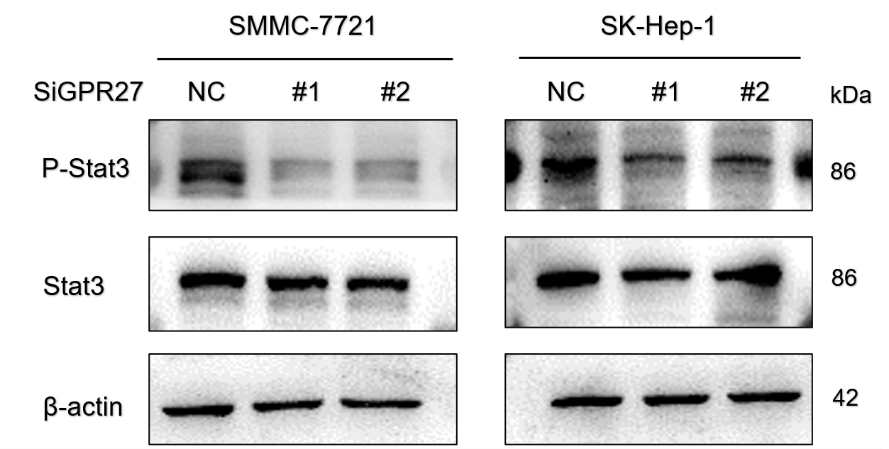
Figure S3.** The protein expression levels of STAT3 and P-STAT3 were analyzed through Western blot analysis after GPR27 knockdown.

**Figure S4.** The protein (A) and mRNA (B) expression levels of GPR27 were analyzed through Western blot analysis after PD98059 treatment.**
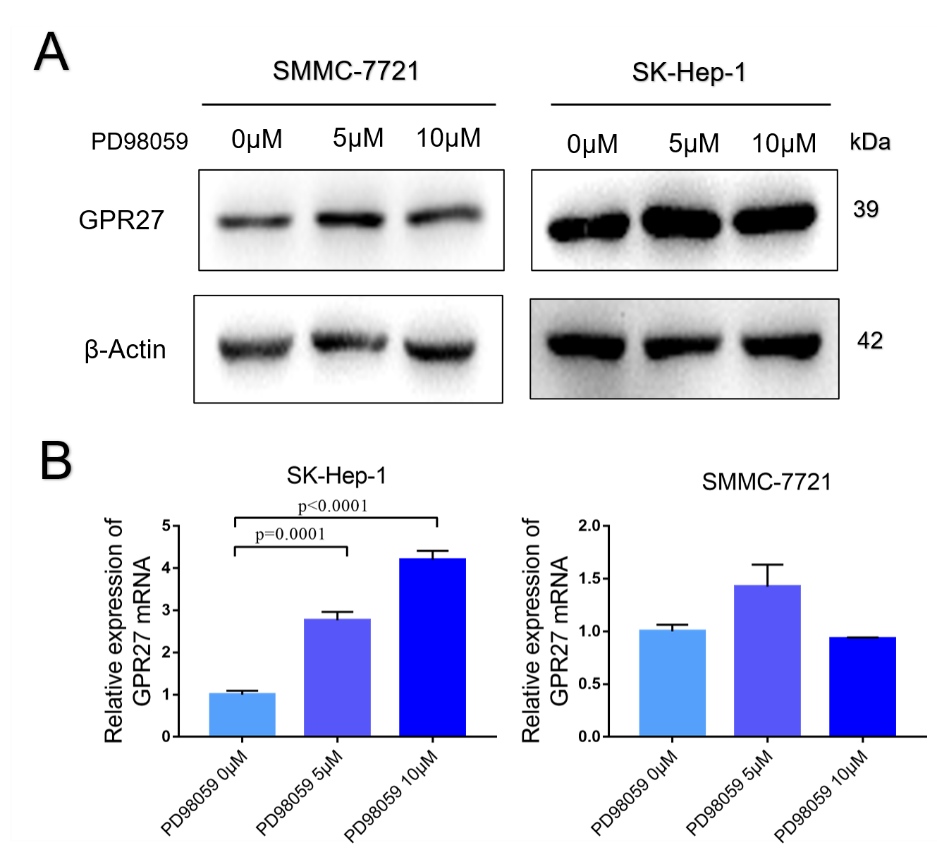
**

**
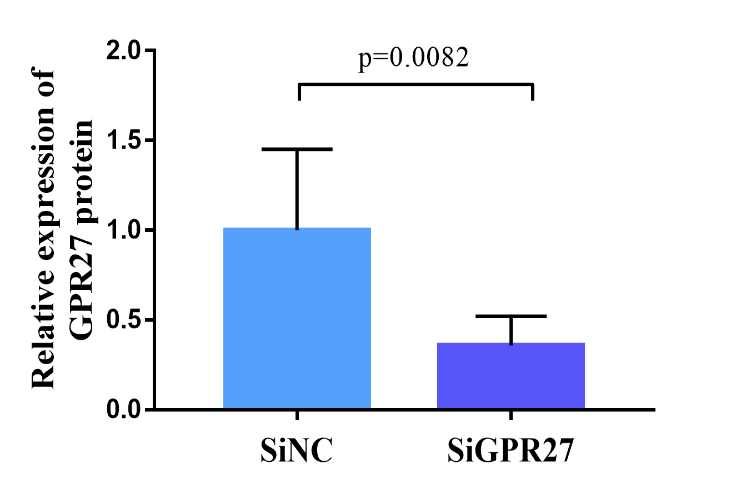
**

**Figure S5.** The protein expression levels of GPR27 between siNC and siGPR27 in tumors were analyzed through Western blot analysis. And we used Gel-Pro Analyzer to quantify bands of siNC and siGPR27.
